# Supplementary material for: Two novel nickel(ii) and cobalt(ii) metal–organic frameworks based on a rigid aromatic multicarboxylate ligand: syntheses, structural characterization and magnetic properties
Source: Royal Society of Chemistry journal article supplement (doi:10.1039/c6ce00674d), 2016-01-01
Supplement: c6ce00674d1.pdf [file c6ce00674d1.pdf]

## Two Novel Nickel(II) and Cobalt(II) Metal-Organic Frameworks Based on a Rigid Aromatic Multicarboxylate Ligand: Syntheses, Structural Characterization and Magnetic Properties

Tuo-Ping Hu<sup>ab</sup>, Zhi-Jia Xue<sup>b</sup>, Bao-Hua Zheng<sup>b</sup>, Xiao-Qing Wang<sup>b</sup>, Xue-Na Hao<sup>b</sup>, You Song<sup>a\*</sup>

a. State Key Laboratory of Coordination Chemistry, School of Chemistry and Chemical Engineering, Nanjing University, Xianlin Road, Nanjing 210023, P. R. China. E-mail: yousong@nju.edu.cn.

b. Department of Chemistry, College of Science, North University of China, Taiyuan 030051, China.

E-mail: hutuopingsx@126.com.

Table S1 Selected bond lengths/Å and bond angles/° for complexes (1) and (2)

| Complex 1                              |             |                           |            |
|----------------------------------------|-------------|---------------------------|------------|
| Ni1—O6 <sup>i</sup>                    | 2.008 (3)   | Ni2—O1W                   | 2.075 (3)  |
| Ni1—O12 <sup>ii</sup>                  | 2.014 (3)   | Ni2—O2W                   | 2.100 (3)  |
| Ni1—O3W                                | 2.051 (3)   | Ni2—O13                   | 2.106 (3)  |
| Ni1—O9                                 | 2.060 (3)   | Ni3—O2                    | 2.016 (3)  |
| Ni1—O7                                 | 2.138 (3)   | Ni3—O11 <sup>v</sup>      | 2.036 (3)  |
| Ni1—O8                                 | 2.156 (3)   | Ni3—O5 <sup>vi</sup>      | 2.036 (3)  |
| Ni1—C28                                | 2.464 (4)   | Ni3—O3W <sup>vii</sup>    | 2.072 (3)  |
| Ni2—O16 <sup>iii</sup>                 | 2.028 (3)   | Ni3—O2W                   | 2.072 (3)  |
| Ni2—O1                                 | 2.035 (3)   | Ni3—O13                   | 2.108 (3)  |
| Ni2—O4 <sup>iv</sup>                   | 2.052 (3)   | O4—Ni2 <sup>iv</sup>      | 2.052 (3)  |
| O11—Ni3 <sup>ix</sup>                  | 2.036 (3)   | O5—C27                    | 1.266 (5)  |
| O3W—Ni3 <sup>vii</sup>                 | 2.072 (3)   | O5—Ni3 <sup>viii</sup>    | 2.036 (3)  |
| O12—Ni1 <sup>ii</sup>                  | 2.014 (3)   | O6—Ni1 <sup>i</sup>       | 2.008 (3)  |
| O16—Ni2 <sup>iii</sup>                 | 2.028 (3)   |                           |            |
| O6 <sup>i</sup> —Ni1—O12 <sup>ii</sup> | 91.80 (13)  | O3W—Ni1—O9                | 90.16 (10) |
| O6 <sup>i</sup> —Ni1—O3W               | 88.70 (11)  | O6 <sup>i</sup> —Ni1—O7   | 90.81 (11) |
| O12 <sup>ii</sup> —Ni1—O3W             | 105.70 (11) | O12 <sup>ii</sup> —Ni1—O7 | 94.60 (12) |

|                             |             |                                          |             |
|-----------------------------|-------------|------------------------------------------|-------------|
| O6 <sup>i</sup> —Ni1—O9     | 178.60 (11) | O3W—Ni1—O7                               | 159.71 (12) |
| O12 <sup>ii</sup> —Ni1—O9   | 87.72 (12)  | O9—Ni1—O7                                | 90.53 (11)  |
| O6 <sup>i</sup> —Ni1—O8     | 87.30 (12)  | O9—Ni1—C28                               | 93.81 (12)  |
| O12 <sup>ii</sup> —Ni1—O8   | 155.77 (12) | O7—Ni1—C28                               | 30.37 (13)  |
| O3W—Ni1—O8                  | 98.49 (11)  | O8—Ni1—C28                               | 30.92 (13)  |
| O9—Ni1—O8                   | 93.67 (12)  | O16 <sup>iii</sup> —Ni2—O1               | 175.65 (12) |
| O7—Ni1—O8                   | 61.23 (12)  | O16 <sup>iii</sup> —Ni2—O4 <sup>iv</sup> | 91.36 (12)  |
| O6 <sup>i</sup> —Ni1—C28    | 87.54 (12)  | O1—Ni2—O4 <sup>iv</sup>                  | 86.09 (12)  |
| O12 <sup>ii</sup> —Ni1—C28  | 124.86 (14) | O16 <sup>iii</sup> —Ni2—O1W              | 86.17 (13)  |
| O3W—Ni1—C28                 | 129.38 (14) | O1—Ni2—O1W                               | 90.22 (13)  |
| O4 <sup>iv</sup> —Ni2—O1W   | 88.27 (14)  | O1W—Ni2—O13                              | 98.85 (13)  |
| O16 <sup>iii</sup> —Ni2—O2W | 93.14 (11)  | O2W—Ni2—O13                              | 78.91 (10)  |
| O1—Ni2—O2W                  | 90.57 (11)  | O2—Ni3—O11 <sup>v</sup>                  | 86.37 (12)  |
| O4 <sup>iv</sup> —Ni2—O2W   | 94.01 (12)  | O2—Ni3—O5 <sup>vi</sup>                  | 178.36 (12) |
| O1W—Ni2—O2W                 | 177.63 (13) | O11 <sup>v</sup> —Ni3—O5 <sup>vi</sup>   | 95.12 (11)  |
| O16 <sup>iii</sup> —Ni2—O13 | 92.78 (11)  | O2—Ni3—O3W <sup>vii</sup>                | 89.67 (11)  |
| O1—Ni2—O13                  | 90.18 (11)  | O11 <sup>v</sup> —Ni3—O3W <sup>vii</sup> | 97.10 (11)  |
| O4 <sup>iv</sup> —Ni2—O13   | 171.98 (12) | O5 <sup>vi</sup> —Ni3—O3W <sup>vii</sup> | 89.45 (11)  |
| O2—Ni3—O2W                  | 93.04 (11)  | O2W—Ni3—O13                              | 79.47 (11)  |
| O11 <sup>v</sup> —Ni3—O2W   | 92.75 (11)  | C1—O1—Ni2                                | 129.1 (3)   |
| O5 <sup>vi</sup> —Ni3—O2W   | 87.59 (11)  | C1—O2—Ni3                                | 129.6 (3)   |
| O3W <sup>vii</sup> —Ni3—O2W | 169.93 (10) | C8—O4—Ni2 <sup>iv</sup>                  | 127.3 (3)   |
| O2—Ni3—O13                  | 88.60 (11)  | C27—O5—Ni3 <sup>viii</sup>               | 135.0 (3)   |
| O11 <sup>v</sup> —Ni3—O13   | 170.50 (11) | C27—O6—Ni1 <sup>i</sup>                  | 127.5 (3)   |
| O5 <sup>vi</sup> —Ni3—O13   | 90.03 (11)  | C28—O7—Ni1                               | 89.4 (3)    |

---

|                             |            |                              |            |
|-----------------------------|------------|------------------------------|------------|
| O3W <sup>vii</sup> —Ni3—O13 | 90.91 (11) | C28—O8—Ni1                   | 88.1 (3)   |
| C29—O9—Ni1                  | 126.1 (3)  | Ni3 <sup>vii</sup> —O3W—H3WB | 109.8      |
| C36—O11—Ni3 <sup>ix</sup>   | 130.5 (3)  | Ni3 <sup>vii</sup> —O3W—H3WA | 109.6      |
| C36—O12—Ni1 <sup>ii</sup>   | 128.7 (3)  | Ni1—O3W—H3WB                 | 109.8      |
| C55—O13—Ni2                 | 137.3 (3)  | Ni3—O2W—Ni2                  | 97.70 (12) |
| C55—O13—Ni3                 | 125.3 (3)  | Ni3—O2W—H2WA                 | 112.1      |
| Ni2—O13—Ni3                 | 96.38 (11) | Ni2—O2W—H2WA                 | 112.2      |
| C56—O16—Ni2 <sup>iii</sup>  | 125.9 (3)  | Ni3—O2W—H2WB                 | 112.2      |
| Ni2—O1W—H1WA                | 108 (4)    | Ni2—O2W—H2WB                 | 112.3      |

Symmetry codes: (i)  $-x+3, -y+3, -z$ ; (ii)  $-x+3, -y+2, -z$ ; (iii)  $-x+1, -y+2, -z+1$ ; (iv)  $-x+1, -y+1, -z+1$ ; (v)  $x-1, y-1, z$ ; (vi)  $x-1, y, z$ ; (vii)  $-x+2, -y+2, -z$ ; (viii)  $x+1, y+1, z$ ; (ix)  $x+1, y, z$ .

## Complex 2

|                                         |             |                                       |             |
|-----------------------------------------|-------------|---------------------------------------|-------------|
| Co1—O1                                  | 2.014 (3)   | Co2—O2 <sup>iv</sup>                  | 2.045 (3)   |
| Co1—O7 <sup>i</sup>                     | 2.077 (3)   | Co2—O2                                | 2.045 (3)   |
| Co1—O5 <sup>ii</sup>                    | 2.096 (3)   | Co2—O6 <sup>ii</sup>                  | 2.128 (3)   |
| Co1—O4 <sup>iii</sup>                   | 2.100 (3)   | Co2—O6 <sup>v</sup>                   | 2.128 (3)   |
| Co1—O1W                                 | 2.148 (4)   | Co2—O2W                               | 2.134 (3)   |
| Co1—O2W                                 | 2.163 (3)   | Co2—O2W <sup>iv</sup>                 | 2.134 (3)   |
| O4—Co1 <sup>vi</sup>                    | 2.100 (3)   | C3—C4                                 | 1.386 (7)   |
| O6—Co2 <sup>ii</sup>                    | 2.128 (3)   | O7—Co1 <sup>vii</sup>                 | 2.077 (3)   |
| O5—Co1 <sup>ii</sup>                    | 2.096 (3)   |                                       |             |
| O1—Co1—O7 <sup>i</sup>                  | 85.86 (14)  | O1—Co1—O1W                            | 89.43 (15)  |
| O1—Co1—O5 <sup>ii</sup>                 | 92.98 (14)  | O7 <sup>i</sup> —Co1—O1W              | 90.26 (14)  |
| O7 <sup>i</sup> —Co1—O5 <sup>ii</sup>   | 173.64 (13) | O5 <sup>ii</sup> —Co1—O1W             | 83.47 (14)  |
| O1—Co1—O4 <sup>iii</sup>                | 173.53 (14) | O4 <sup>iii</sup> —Co1—O1W            | 84.29 (14)  |
| O7 <sup>i</sup> —Co1—O4 <sup>iii</sup>  | 92.58 (13)  | O1—Co1—O2W                            | 98.34 (13)  |
| O5 <sup>ii</sup> —Co1—O4 <sup>iii</sup> | 87.88 (13)  | O7 <sup>i</sup> —Co1—O2W              | 94.62 (11)  |
| O5 <sup>ii</sup> —Co1—O2W               | 91.73 (12)  | O2 <sup>iv</sup> —Co2—O6 <sup>v</sup> | 94.53 (13)  |
| O4 <sup>iii</sup> —Co1—O2W              | 88.04 (12)  | O2—Co2—O6 <sup>v</sup>                | 168.42 (12) |
| O1W—Co1—O2W                             | 171.09 (15) | O6 <sup>ii</sup> —Co2—O6 <sup>v</sup> | 84.28 (18)  |

|                                         |             |                                         |            |
|-----------------------------------------|-------------|-----------------------------------------|------------|
| O2 <sup>iv</sup> —Co2—O2                | 88.9 (2)    | O2 <sup>iv</sup> —Co2—O2W               | 81.39 (12) |
| O2 <sup>iv</sup> —Co2—O6 <sup>ii</sup>  | 168.42 (12) | O2—Co2—O2W                              | 95.49 (12) |
| O2—Co2—O6 <sup>ii</sup>                 | 94.53 (13)  | O6 <sup>ii</sup> —Co2—O2W               | 87.28 (12) |
| O6 <sup>v</sup> —Co2—O2W                | 95.95 (11)  | O2—Co2—O2W <sup>iv</sup>                | 81.38 (12) |
| O2 <sup>iv</sup> —Co2—O2W <sup>iv</sup> | 95.49 (12)  | O6 <sup>ii</sup> —Co2—O2W <sup>iv</sup> | 95.95 (11) |

Symmetry codes: (i)  $-x, y, -z+1/2$ ; (ii)  $-x+1, -y+1, -z+1$ ; (iii)  $-x+1/2, y+1/2, -z+1/2$ ; (iv)  $-x+1/2, -y+3/2, -z+1$ ; (v)  $-x+1/2, y-1/2, -z+1/2$ .

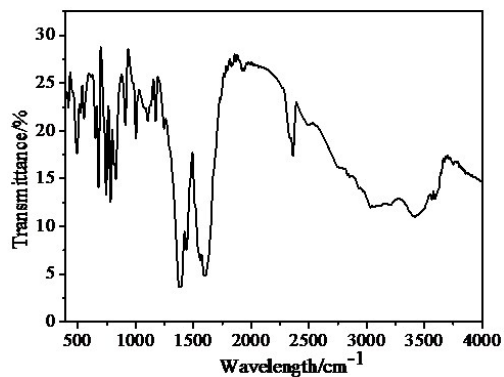

(a) The IR spectra for 1.

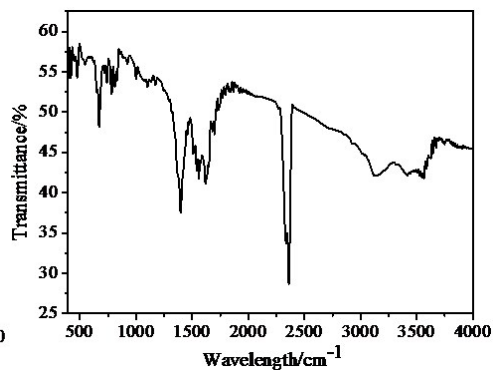

(b) The IR spectra for 2.

**Fig. S1.** The IR spectra of the MOFs.

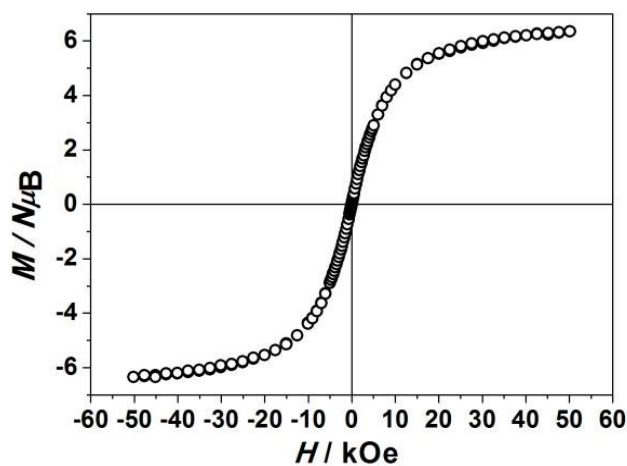

**Fig. S2** The hysteresis loop for 1.

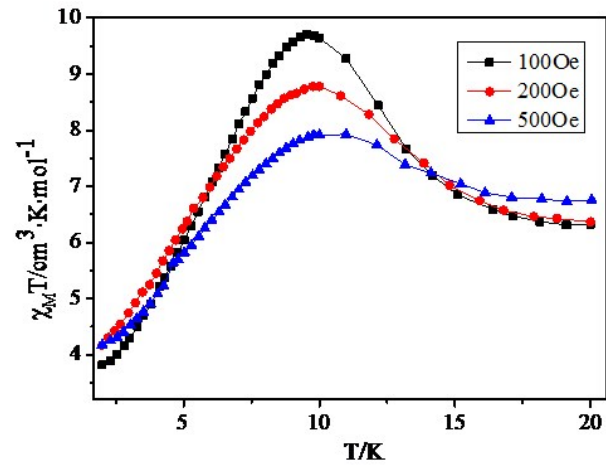

Fig. S3 The  $\chi_M T$  vs.  $T$  plots of **2** at the indicated field.

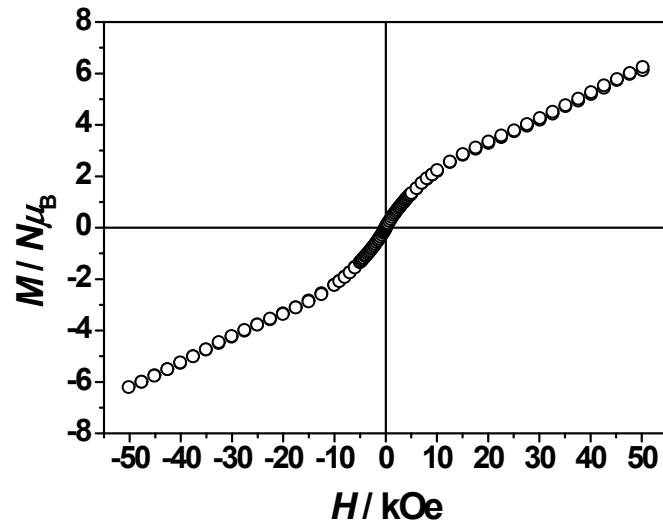

Fig. S4 The hysteresis loop for **2**.
